# Supplementary material for: PEG-Linked luminescent platinum(ii) complex as aqueous polymeric molecular light switch for protein binding reactionsElectronic supplementary information (ESI) available: general experimental procedure, synthesis and characterization of 1 and 2, titration experiments and urea unfolding of BSA. See http://www.rsc.org/suppdata/cc/b2/b207395a/
Source: Royal Society of Chemistry journal article supplement (doi:10.1039/b207395a), 2002-10-02
Supplement: b207395a.doc [file b207395a.doc]

**Supplementary Information for *Chem. Commun.***

PEG-Linked Luminescent Platinum(II) Complex as Aqueous Polymeric Molecular Light Switch for Protein Binding Reactions

Chi-Ming Che,* Jun-Long Zhang and Li-Rong Lin

*Department of Chemistry and Open Laboratory of Chemical Biology of Institute of Molecular Technology for Drug Discovery and Synthesis, The University of Hong Kong, Pokfulam Road, Hong Kong. Fax: (852)2857-1586; E-mail: cmche@hku.hk*

General experimental procedure, synthesis and characterization of **1** and **2**, titration experiments and urea unfolding of BSA.

**General Experimental Procedure**

The solvents were purified according to standard methods.[[1]](#footnote-2) K2PtCl4, bovine serum albumin, human blood -globulin, human albumin and chicken egg albumin were obtained from commercial sources. Infrared spectra were recorded on a BIO RAD FT-IR spectrometer. Fast atom bombardment (FAB) mass spectra were obtained on a Finnigan Mat 95 mass spectrometer. 1H NMR spectra were recorded on DPX400 Bruker FT-NMR spectrometer with chemical shifts (in ppm) relative to tetramethylsilane. UV-vis spectra were recorded on a Perkin-Elmer Lambda 19 UV/vis spectrophotometer. Emission spectra were obtained on a SPEX Fluorolog-2 Model F11 fluorescence spectrophotometer.

**Characterization of the complexes 1 and 2**

Complex **1** was prepared according to literature[[2]](#footnote-3): yellow crystalline powder. IR (Nujol):  = 3400 (S, OH) cm-1. FAB MS: 554 (M+), 518 (M+-Cl); 1H NMR (400 MHz, *d*6-DMSO):  10.07 (s, 1H), 8.93 (d, 1H, J = 8.4 Hz), 8.76 (d, 1H, *J* = 8.4 Hz), 8.46 (s, 1H), 8.38 (t, 1H, J = 7.8 Hz), 8.21 (s, 1H), 8.04 (d, 2H, J = 8.4 Hz), 7.93 (t, 1H, *J* = 6.4 Hz), 7.82 (d, 1H, *J* = 7.2 Hz), 7.49 (d, 1H, *J* = 6.8 Hz), 7.13 (m, 2H), 6.96 (d, 2H, J = 8.8 Hz).

**Preparation of Water Soluble Polymer-Supported Platinum(II) Complex 2.** To a solution of **1** (1.0 mmol) in DMF (30 mL) was added methoxy poly(ethylene glycol) mesylate[[3]](#footnote-4) (4.0 g, 0.8 mmol) and anhydrous potassium carbonate (2.0 g). The mixture was vigorously stirred at 60 C for 6 h under an argon atmosphere. The solvent was removed under reduced pressure and the residue was dissolved in CH2Cl2 (50 mL). The solution was washed with brine (20  3 mL) and water (20 mL), dried with anhydrous sodium sulfate, and then concentrated to 2 mL. The residue was treated with diethyl ether at 0 C. The red solid was washed several times with cold propan-2-ol and dried at 80 C *in vacuo* for 12 h.

**2**: Yield: 90%. IR (KBr): (CH2OCH2) 1280 cm-1. 1H-NMR (CDCl3): 8.02 (m, 1H), 7.67 (m, 4H), 7.50 (m, 2H), 7.33 (m, 1H), 7.10 (m, 1H), 7.04 (m, 4H), 4.23 (t, 2H, J = 8.2 Hz, PEGCH2CH2O-[Pt]), 3.88-3.46 (polyethylene glycol peak), 3.38 (s, MeO-PEG). Loading of ruthenium porphyrin **1** was 0.17 mmol per gram.

**Titration Experiments**.

The titration experiments were conducted by measuring change of emission intensity at 543 nm upon addition of proteins (0.00 to 3.15 M, step: 0.15 M) to a solution of complex **2** (20 M) in 100mM buffer (Na2HPO4-NaH2PO4 with 0.9% NaCl, pH = 7.40) at 25ºC (excitation wavelength = 390 nm).

**Urea Unfolding of BSA**.

The unfolding experiment was conducted by measuring changes of emission intensity at 543 nm upon addition of urea (0.0 M to 8.0 M, step: 0.5 M) to a solution of complex **2** (20 M) and BSA (0.15 M) in 100mM buffer (Na2HPO4-NaH2PO4 with 0.9% NaCl, pH = 7.40) at 25ºC (excitation wavelength = 390 nm).

The emission spectra of **2** (20 M) measured in different urea concentration (0.0, 0.5, 1.0, 2.0, 4.0 6.0 and 8.0 M). (Insert: luminescence intensity at 543 nm versus [urea], ex = 390 nm, 298 K).

1. D. D. Perrin, W. L. F. Armarego, D. R. Perrin, *Purification of Laboratory Chemicals*, 2nd ed., Pergamon, Oxford, **1980**. [↑](#footnote-ref-2)
2. T. C. Cheung, K. K. Cheung, S. M. Peng, C. M. Che, *J. Chem. Soc. Dalton Trans*. 1996, 1645. [↑](#footnote-ref-3)
3. Benaglia, M.; Cinquini, M.; Cozzi, F. *Tetrahedron Lett*. **1999**, *40*, 2019. [↑](#footnote-ref-4)
